# Supplementary material for: Synergic Fabrication of Naringin Molecule into Polymeric Nanoparticles for the Treatment and Nursing Care of Lung Cancer Therapy
Source: Research Square preprint supplement (doi:10.21203/rs.3.rs-255282/v1), 2021-03-11

**Synergic Fabrication of Naringin Molecule into Polymeric Nanoparticles for the Treatment and Nursing Care of Lung Cancer Therapy**


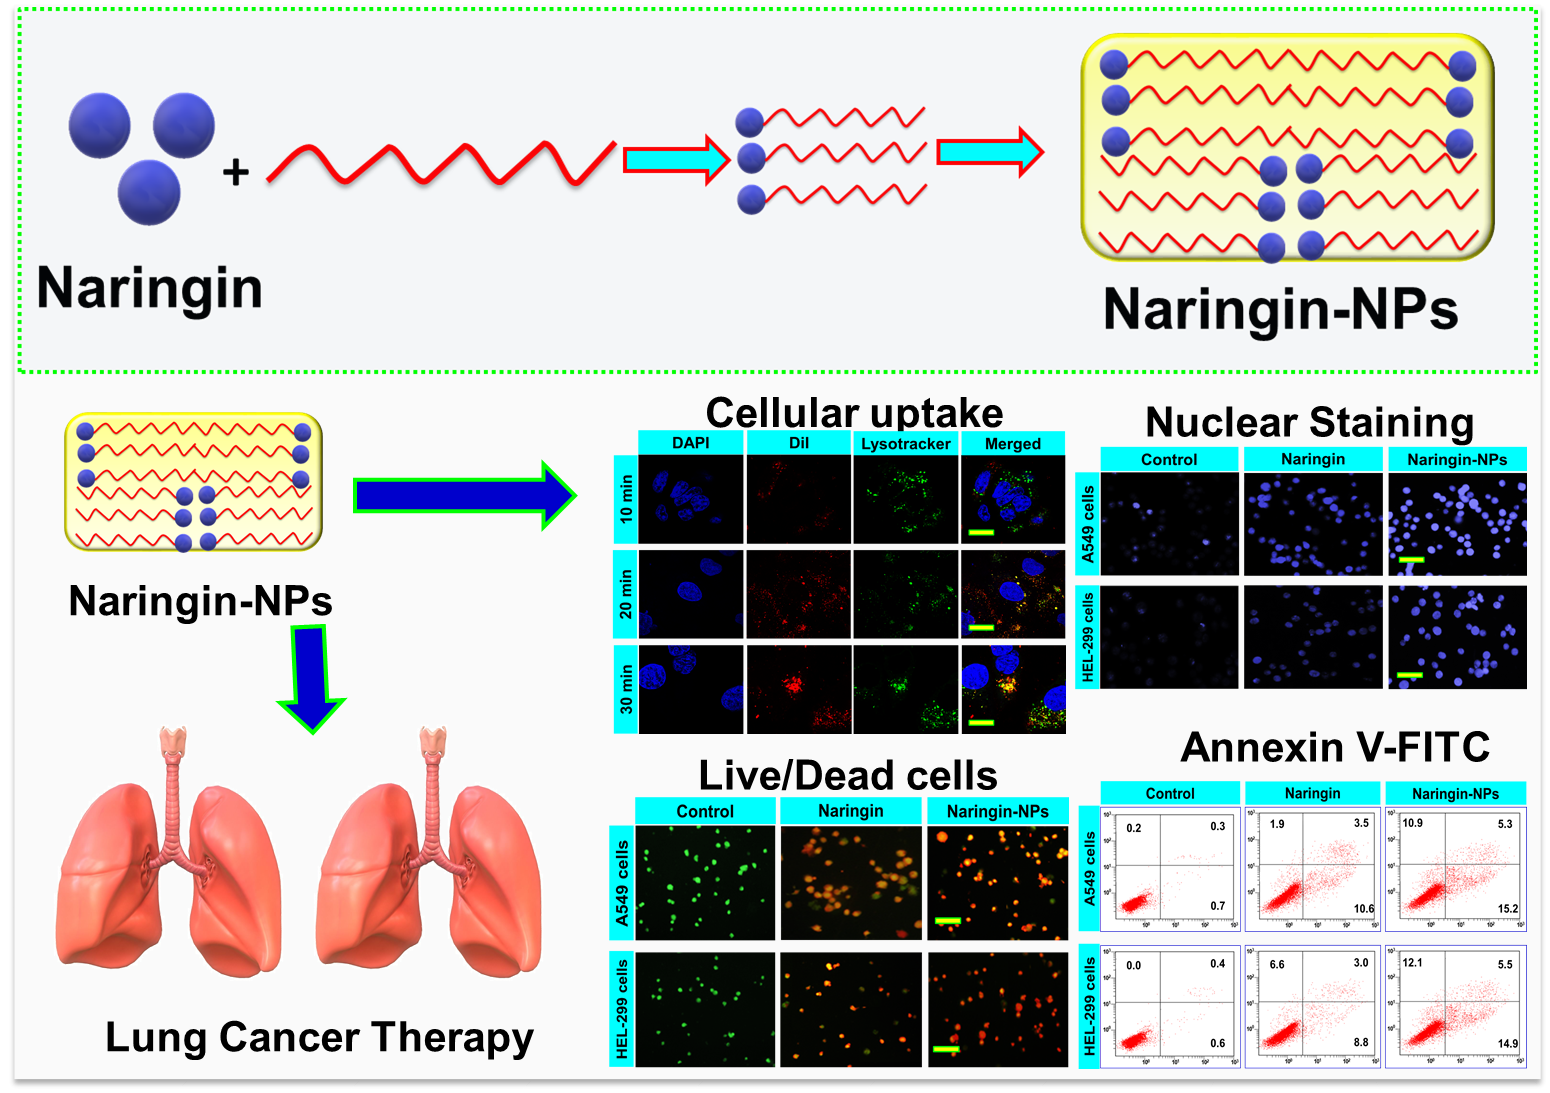

Supplement: Supplementary file 1 [file 15205d323d41b5204ca7f880.docx]
